# Supplementary material for: Acetyl-CoA is a key molecule for nephron progenitor cell pool maintenance
Source: PubMed Central journal article supplement (PMC10676360; doi:10.1038/s41467-023-43513-7), 2023-11-25
Supplement: 41467_2023_43513_MOESM1_ESM.pdf [file 41467_2023_43513_MOESM1_ESM.pdf]

## Supplementary Figures

**a**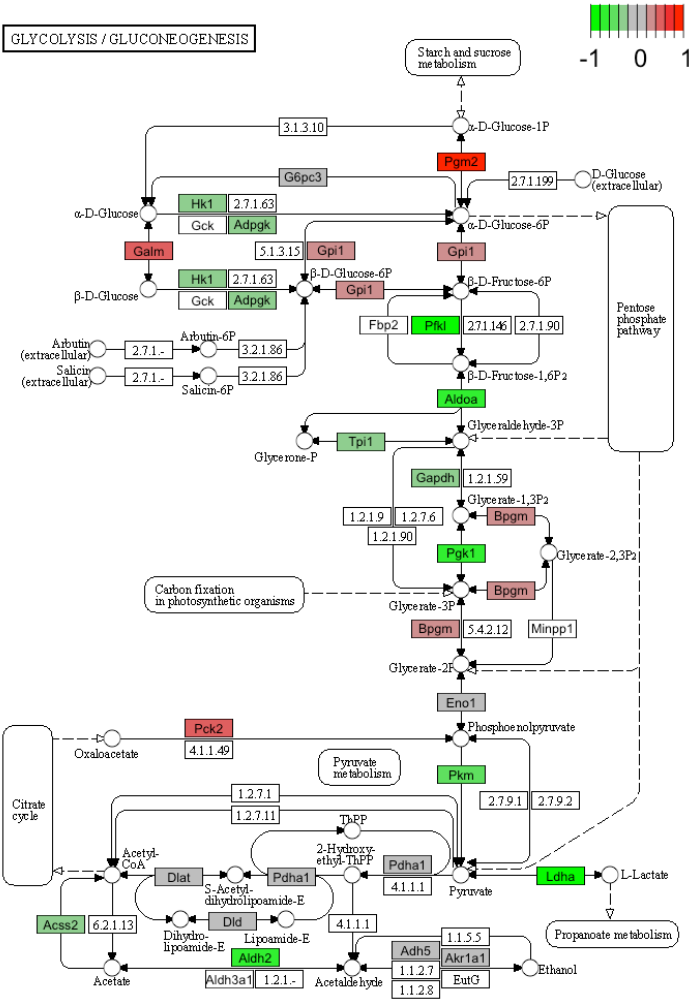**b**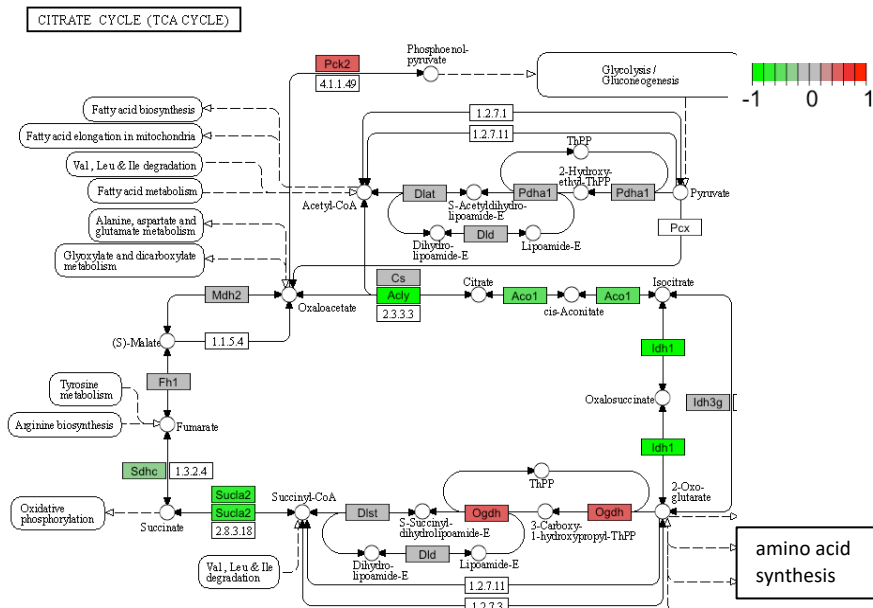**c**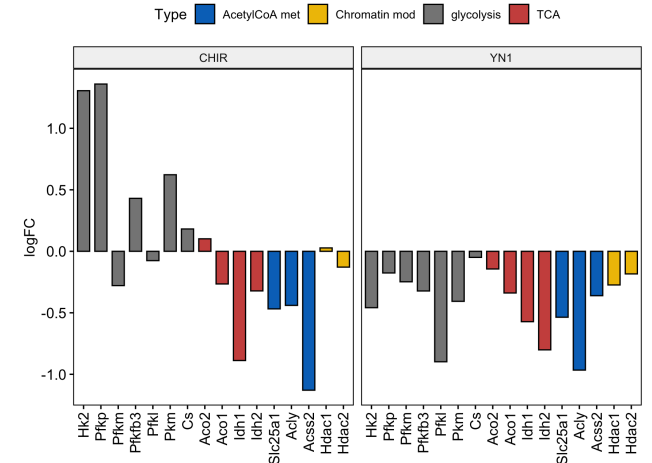**d**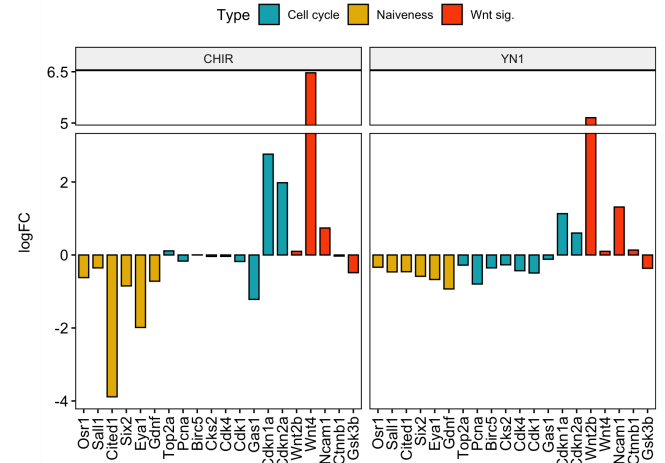

**Fig.S1: Molecular characterization of transcriptomes from YN1 and CHIR-treated NPC.**

To visualize changes in gene expression, the LogFC values between YN1-treated NPCs and control NPCs were scaled between -1 (green, downregulated), 0 (grey, no change), and +1 (red, upregulated), and the scores were plotted on the KEGG Glycolysis/Gluconeogenesis (a), KEGG citrate cycle (b). LogFC values, representing the gene expression changes between YN1-treated and control NPCs for genes associated with acetyl-CoA production and metabolism, were plotted for multiple genes. These values were color-coded according to their pathway signature (c). LogFC values, representing the gene expression changes between YN1-treated and control NPCs for genes associated with cell cycle (gold), NPC naivness (cyan), or WNT signaling (red) were plotted for multiple genes (d). Source data are provided as a Source Data file.





**Fig.S2: Impact of YN1 treatment on cell cycle genes and WNT signaling.** LogFC values depicting gene expression changes between YN1-treated NPCs and control NPCs were normalized to a color scale ranging from -1 (green, downregulated) to +1 (red, upregulated). These values were then visualized on the KEGG cell cycle pathway (a) and KEGG WNT signaling pathway (b). Notably, the figure highlights the activation of cell cycle inhibitors, including p21 (highlighted in red oval), and a reduction in several genes of the intracellular WNT machinery following YN1 treatment. Source data are provided as a Source Data file.



**Fig.S3: PI3K and MAPK pathways response to YN1 treatment.** LogFC values depicting gene expression changes between YN1-treated NPCs and control NPCs were normalized to a color scale ranging from -1 (green, downregulated) to +1 (red, upregulated). These values were then visualized on the KEGG PI3K-AKT signaling pathway (a) and MAPK signaling pathway (b). The figure highlights a reduction in key elements in these pathways such as PI3K catalytic subunit and AKT1. Source data are provided as a Source Data file.

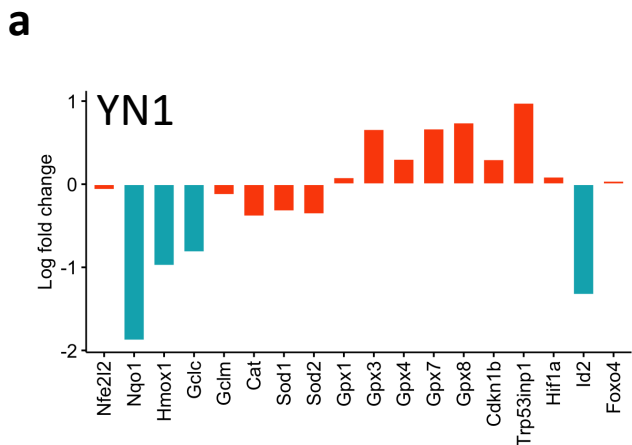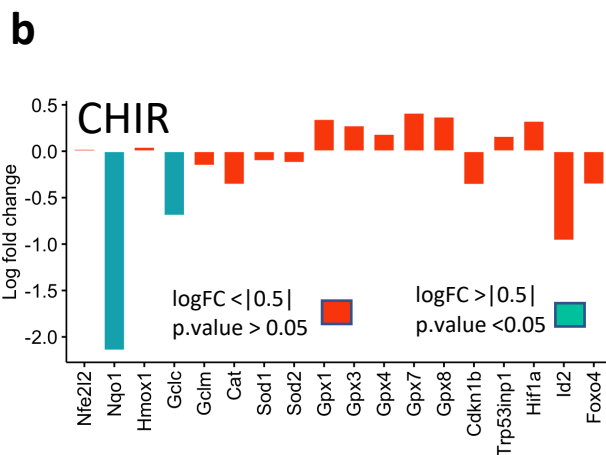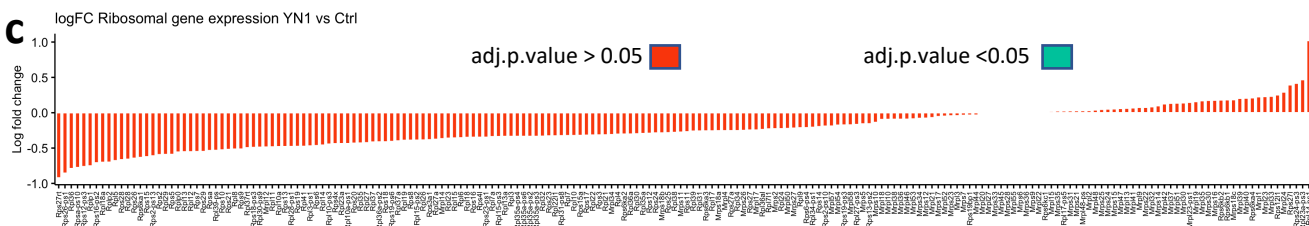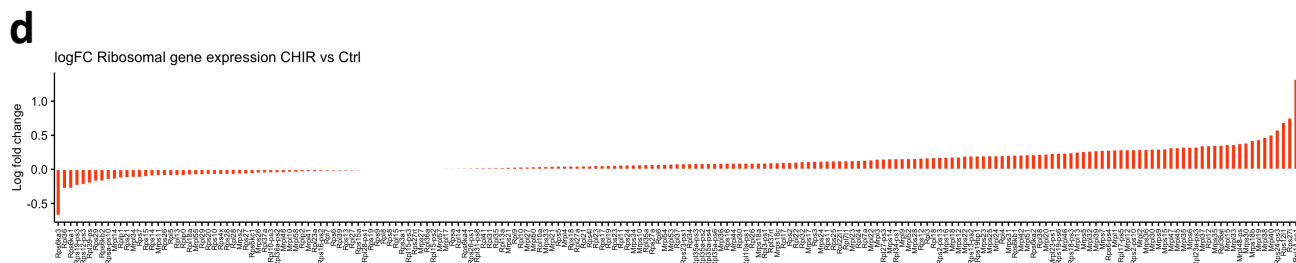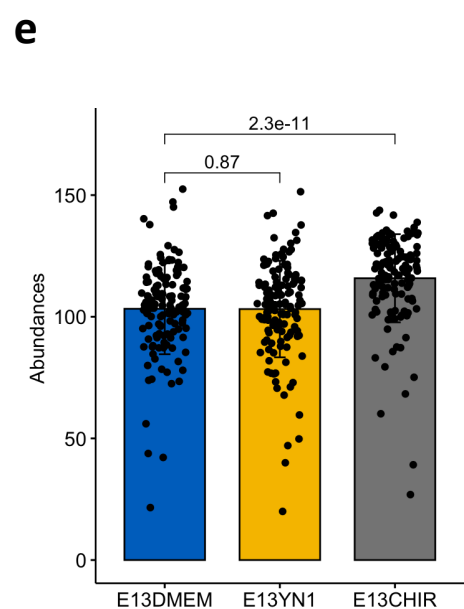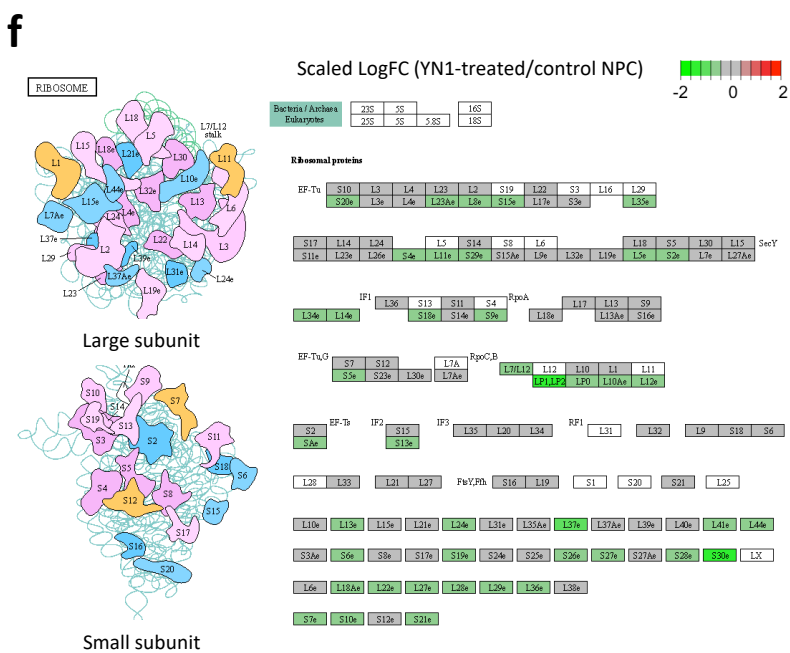

**Fig.S4: Evaluation of stress oxidative response and protein synthesis in the transcriptome of YN1 and CHIR-treated NPC.** The LogFC values of genes associated with the oxidative stress response were compared between YN1-treated and control NPCs (a), or CHIR-treated and control NPCs (b) and color-coded based on their LogFC and p-value variation. Only LogFC variations greater than |0.5| and p-values less than 0.05 were considered significant. The LogFC values of ribosomal protein-coding gene expression after YN1 (c) and CHIR (d) treatment are shown. Differences in the abundance of ribosomal proteins after treatment with either YN1 or CHIR compared to control NPC (e). The Kruskal-Wallis test was used for the comparisons across groups and p-values are shown in the figure. To visualize changes in ribosomal protein-coding gene expression, the LogFC values were scaled between YN1-treated NPCs and control NPCs and color-coded as green (downregulated), grey (no change), or red (upregulated), with a scale ranging from -1 to +1. These scores were then plotted on the KEGG Ribosomal pathway (f). Source data are provided as a Source Data file.

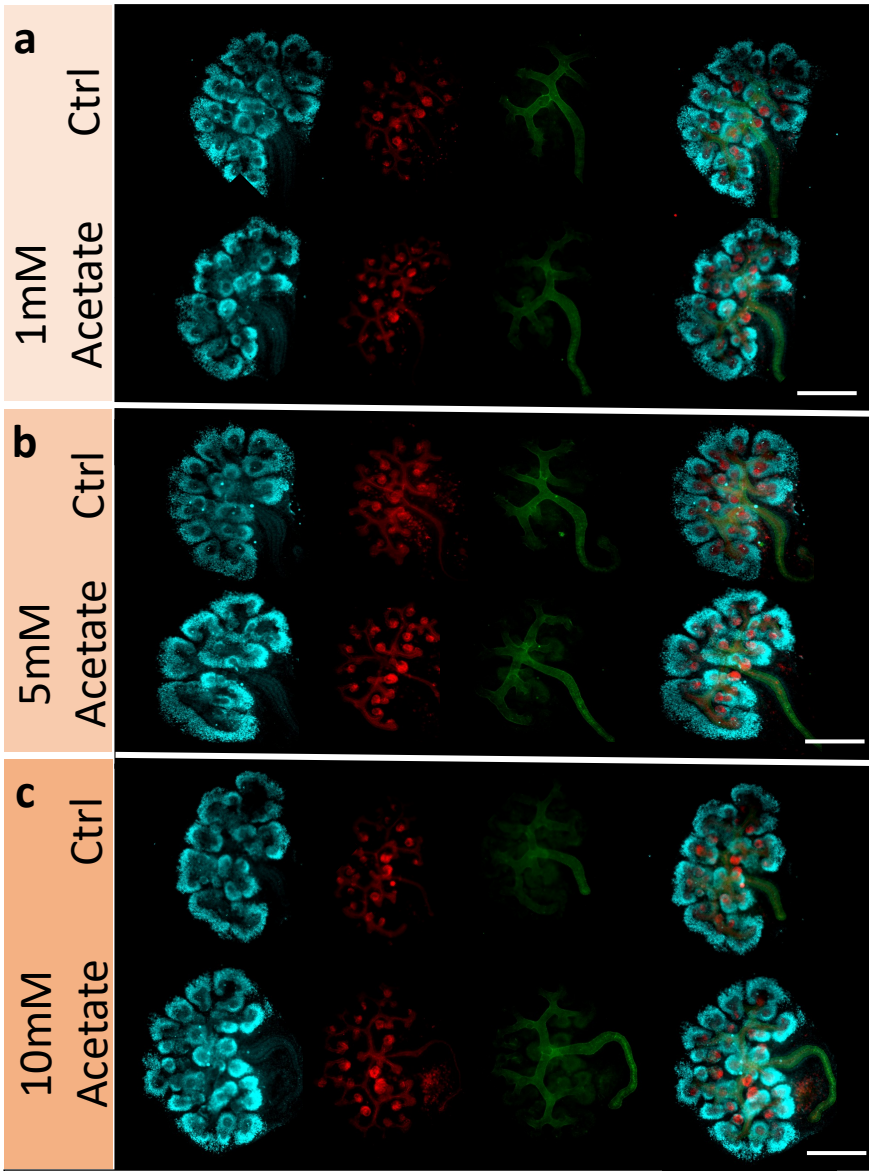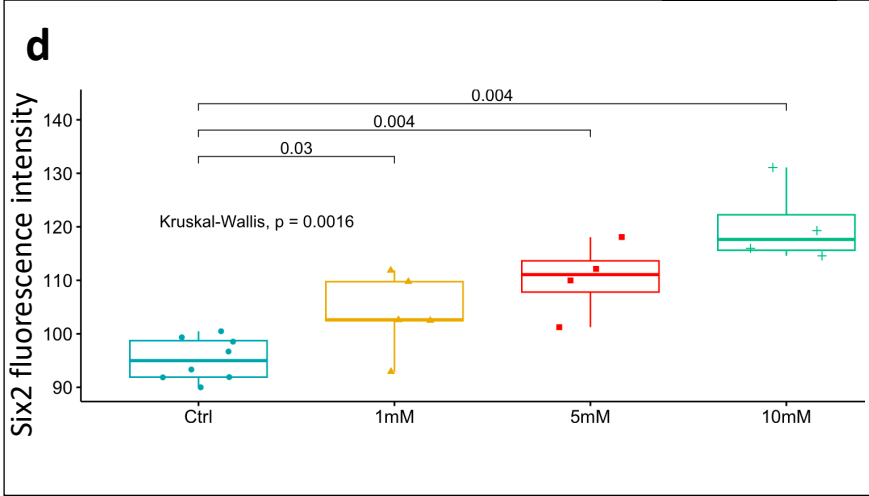

**Fig.S5: Sodium acetate treatment increases CM size.** E12.5 mouse kidneys were incubated for 24h in the presence or absence of 1 mM (a), 5 mM (b), or 10 mM sodium acetate (c) and probed with antibodies against Six2 (nephron progenitor cells, Cyan), Lhx1 (nascent nephrons, Red) or DBA (ureteric bud, green). Quantification of Six2 antibody staining, control kidneys n = 8, kidneys treated with sodium acetate 1mM n = 5; 5 mM n = 4; 10 mM n =5) (d). Scale bar 250  $\mu$ m. Differences between groups were tested with the Kruskal-Wallis test, and Dunn's test for pairwise multiple comparisons, and p-values are reported. Source data are provided as a Source Data file.

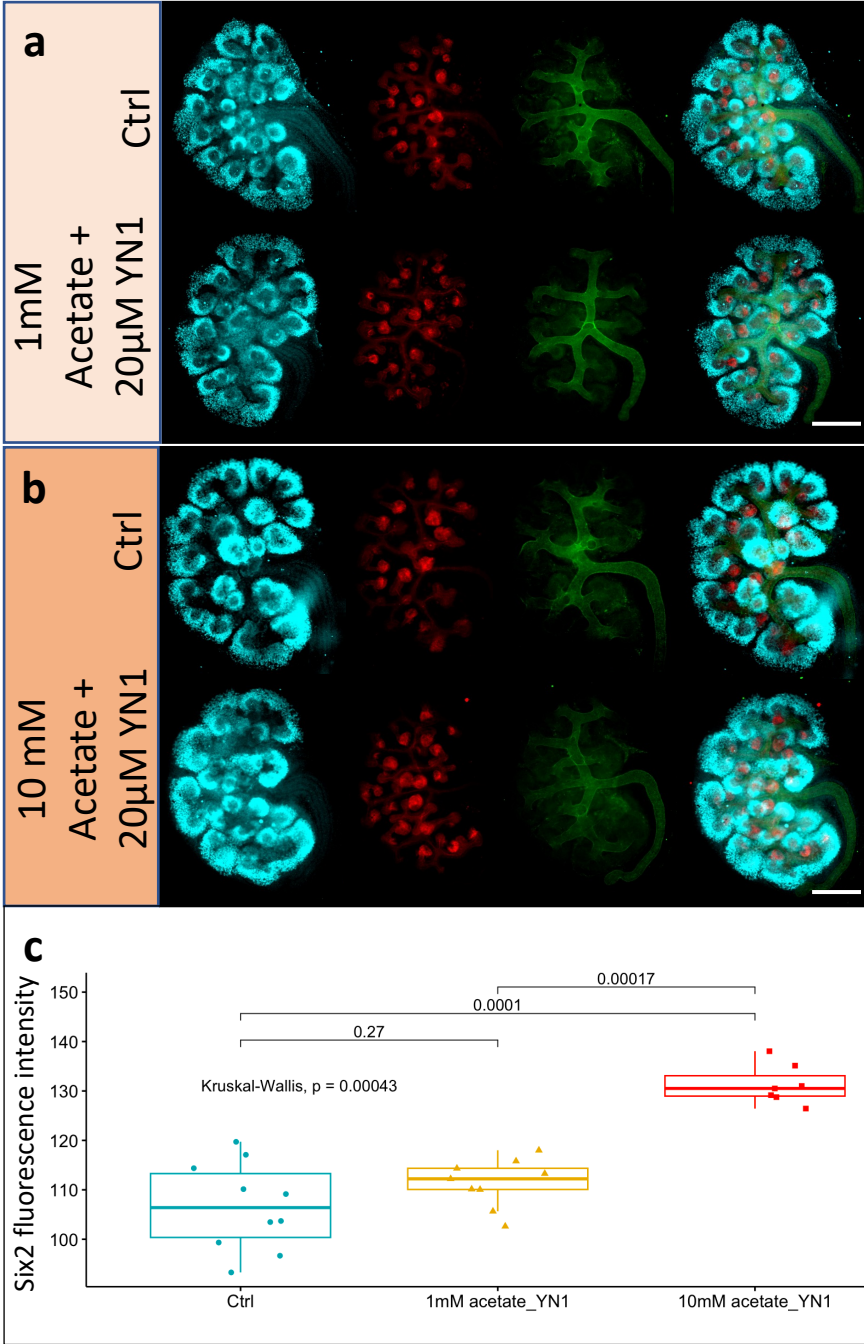



**Fig.S6: Sodium acetate treatment prevents the YN1 effect on developing kidneys.** E12.5 mouse kidneys were incubated for 24h in the presence of 20  $\mu$ M YN1 + either 1 mM (a) or 10 mM sodium acetate (b) and probed with antibodies against Six2 (nephron progenitor cells, Cyan), Lhx1 (nascent nephrons, Red) or DBA (ureteric bud, green). Quantification of Six2 antibody staining, control kidneys n = 10, kidneys treated with sodium acetate 1mM n = 10; 5 mM n = 4; 10 mM n =7) (c). Control kidneys were incubated with vehicle only, scale bar= 250  $\mu$ m. Differences between groups were tested with the Kruskal-Wallis test, and Dunn's test for pairwise multiple comparisons, and p-values are reported. Source data are provided as a Source Data file.

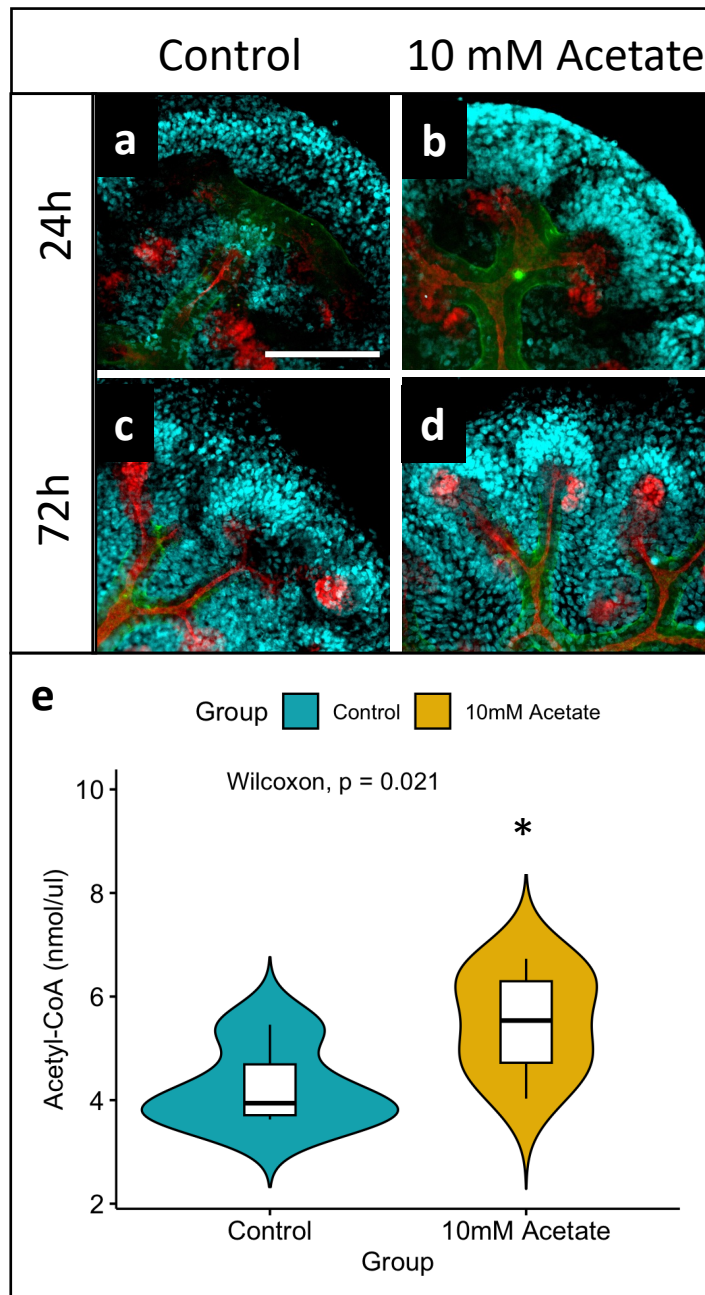

**Fig.S7: Effects of prolonged exposure to sodium acetate on developing kidneys.** E12.5 mouse kidneys were incubated for 24 hours in vehicle (a) or 10 mM sodium acetate (b). E12.5 mouse kidneys were incubated for 72 hours in vehicle (c) or 10 mM sodium acetate (d). Samples were probed with antibodies against Six2 (nephron progenitor cells, cyan), Lhx1 (nascent nephrons, red), or DBA (ureteric bud, green), n = 6 pairs of E12.5 embryonic kidneys per experimental group. The culture media was changed daily until the time of collection at 24 or 72 hours. Scale bar: 100  $\mu$ m. Sixteen pairs of E12.5 mouse kidneys were incubated for 24 hours in the presence of vehicle or 10 mM sodium acetate, and the cytosolic acetyl-CoA accumulation was measured at the end of the incubation time as described in Methods (e). Differences between groups were tested using the Wilcoxon Rank Sum test with a p-value reported. Source data are provided as a Source Data file.

Ctrl

Het

Mut

*Acly*<sup>F/+</sup>;*Six2Cre*<sup>-/-</sup>

*Acly*<sup>F/+</sup>;*Six2Cre*<sup>+/-</sup>

*Acly*<sup>F/F</sup>;*Six2Cre*<sup>+/-</sup>

a

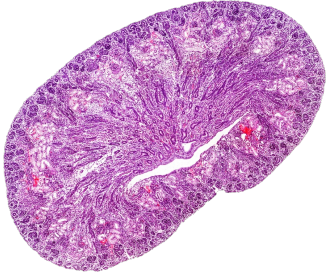

b

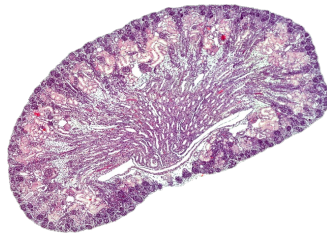

c

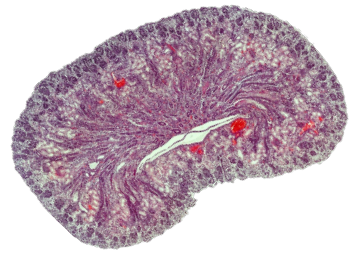

d

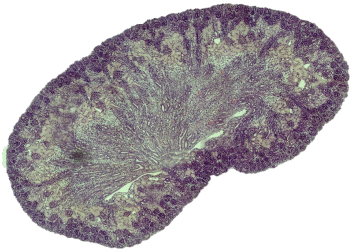

e

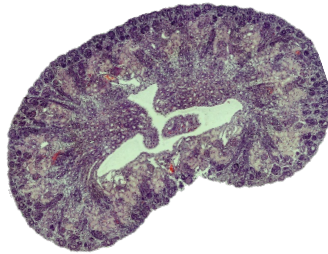

f

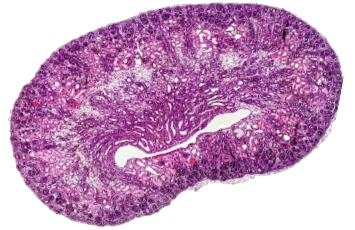

g

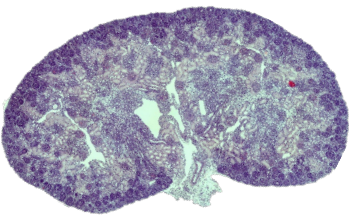

h

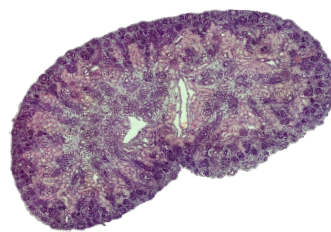

i

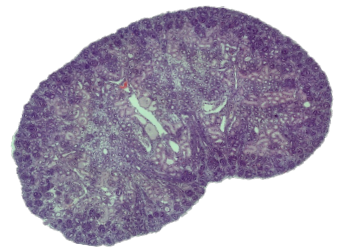

j

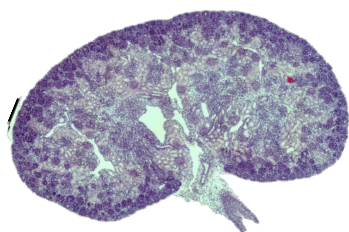

k

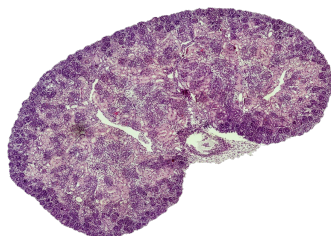

l

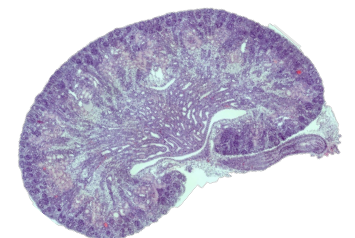

**Fig.S8: Morphological characterization of P0 wild type, heterozygous and mutant kidneys lacking *Acly* in *Six2*-expressing cells.** H&E staining of P0 *Acly*<sup>F/+</sup>;*Six2Cre*<sup>-/-</sup> (control) kidneys (a,d,g,j). H&E staining of P0 *Acly*<sup>F/+</sup>;*Six2Cre*<sup>+/-</sup> (heterozygous) kidneys (b,e,h,k). H&E staining of P0 *Acly*<sup>F/F</sup>;*Six2Cre*<sup>+/-</sup> (mutant) kidneys (c,f,i,l). Notice mutant kidneys with narrower nephrogenic zones and fewer nascent nephrons. N = 4 kidneys per genotype displayed.



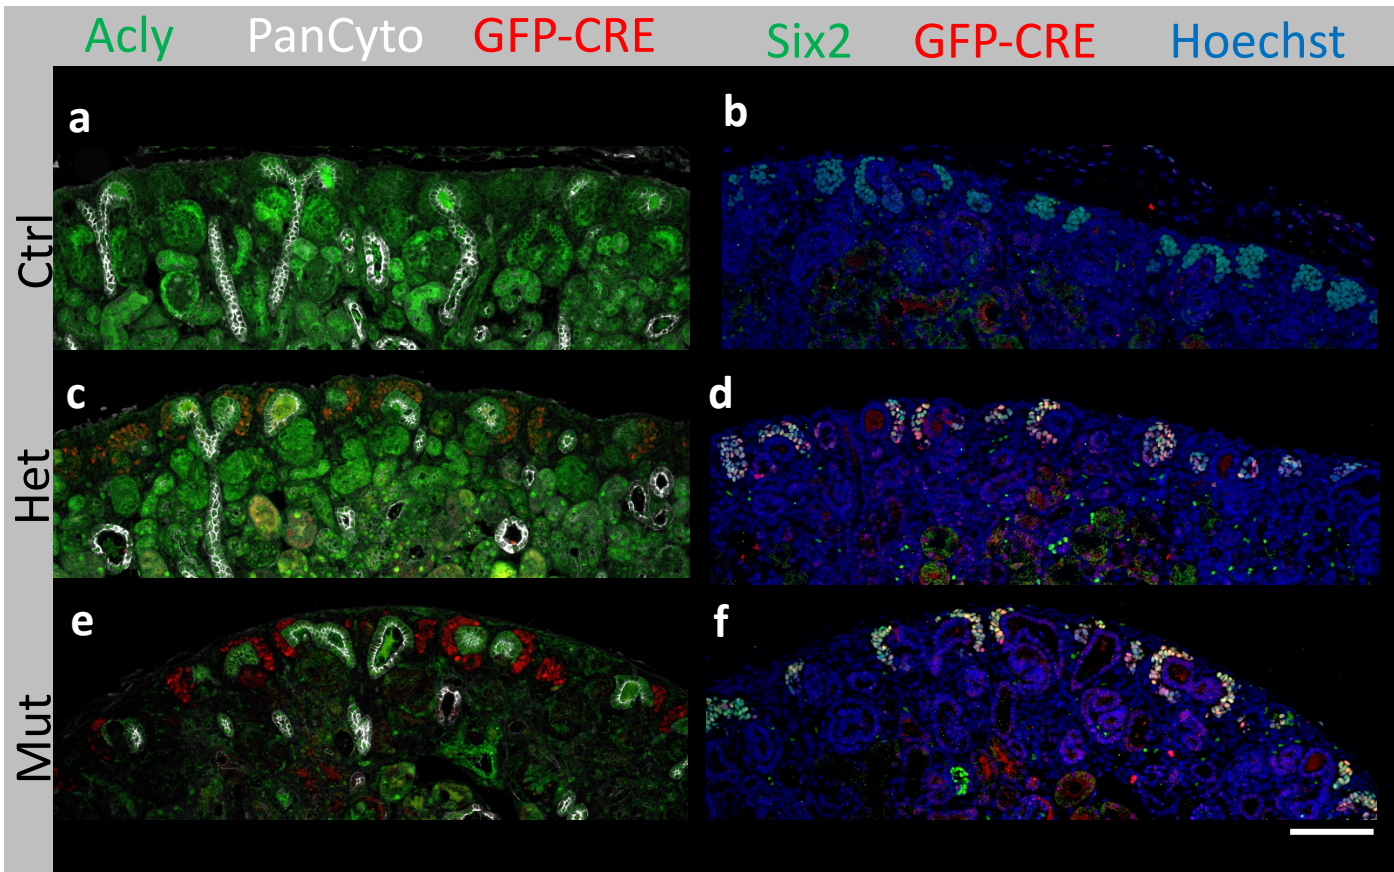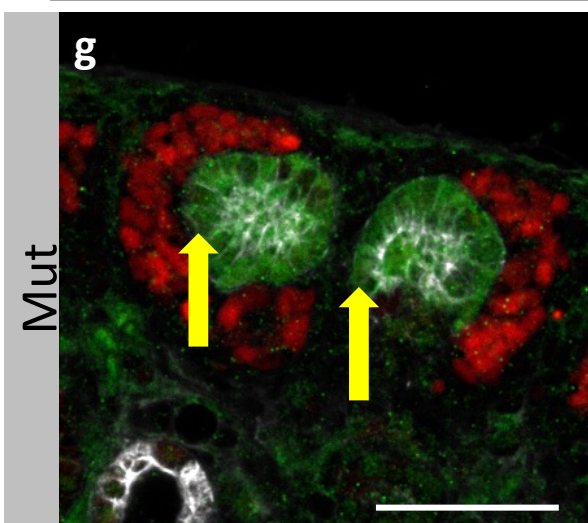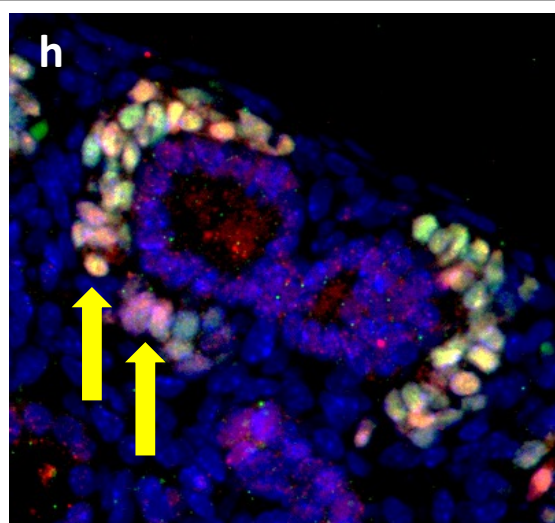

**Fig.S9: Removal of Acly from Six2<sup>+</sup> cells eliminated Acly from the entire nephrogenic lineage.** P0 AclyF/+;Six2Cre<sup>-/-</sup> (control, n=6) kidneys (a,b), P0 AclyF/+;Six2Cre<sup>+/-</sup> (heterozygous, n=6) kidneys (c,d), and P0 AclyF/F;Six2Cre<sup>+/-</sup> (mutant n=5) kidneys (e,f) were collected, and analyzed by immunostaining to confirm efficient Acly removal from nephrogenic lineage. Antibodies used and color codes are depicted in the figure. Efficient Acly removal was observed in the mutant kidney (e,f) as evidenced by the absence of green (Acly) signal in the nephrogenic lineage. However, the green (Acly) signal was still present in the UB lineage, and it colocalized with the UB marker Pan cytokeratin (g, yellow arrows). The Cre transgene expression exclusively colocalized with the Six2<sup>+</sup> cells (h, yellow arrows), which confirmed the specificity and efficiency of Acly recombination in NPC. A-F scale bar = 250  $\mu$ m, g,h scale bar = 100  $\mu$ m. Nuclear staining was carried out with Hoechst 33342.

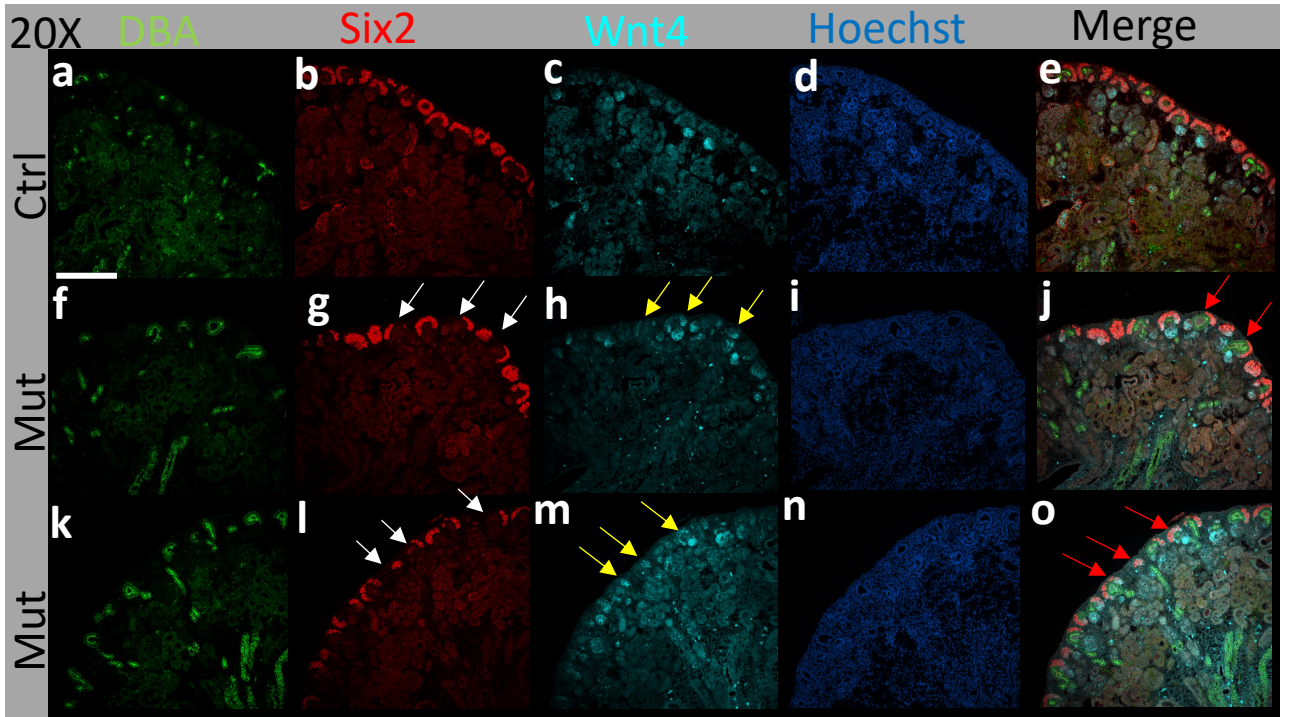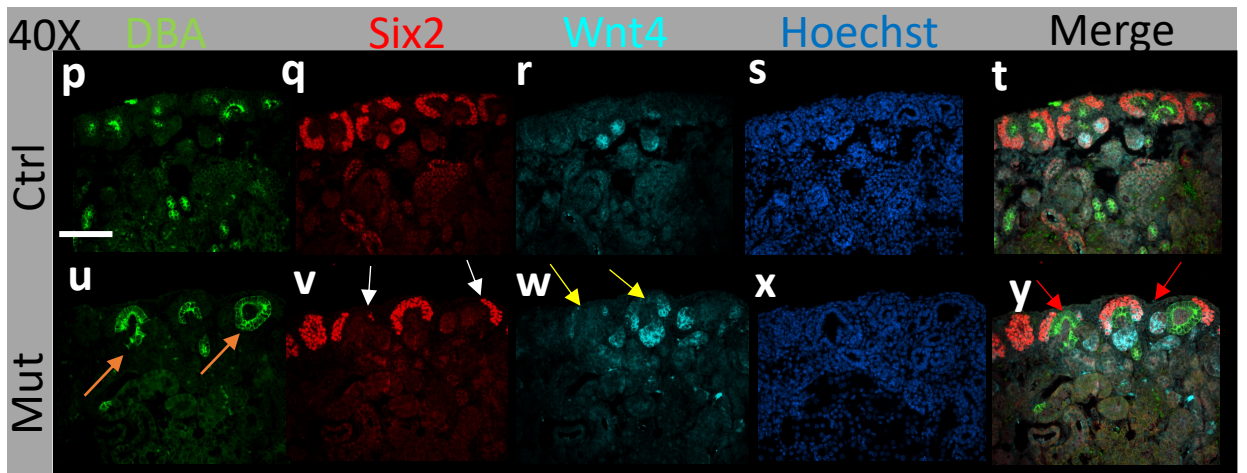



**Fig.S10: Immunofluorescence staining of kidney developmental makers in *Acly* mutant CM at P0.** 20X visualization of the nephrogenic zone of control kidneys (Ctrl) (a-e) and two mutant kidneys (f-o) lacking expression of *Acly* in the CM (Mut, mutant kidney). Orange arrows point to dilated UB ampullae; white arrows show areas with depleted cap-mesenchyme; yellow arrows show expansion of Wnt4 towards the cap-mesenchyme. Red arrows show areas co-stained with Wnt4 and Six2 antibodies. On the second panel, a 40x close-up of Ctrl (p-t) and Mut (u-y). These experiments were repeated with at least 5 kidneys per genotype with similar results. UB was stained with DBA (green); CM was stained with Six2 antibody (Red); nascent nephrons and differentiating NPC were stained with Wnt4 (Cyan); Nuclear staining was carried out with Hoechst 33342 (blue). Scale bar a-o = 500  $\mu$ m; p-y scale bar = 250  $\mu$ m.

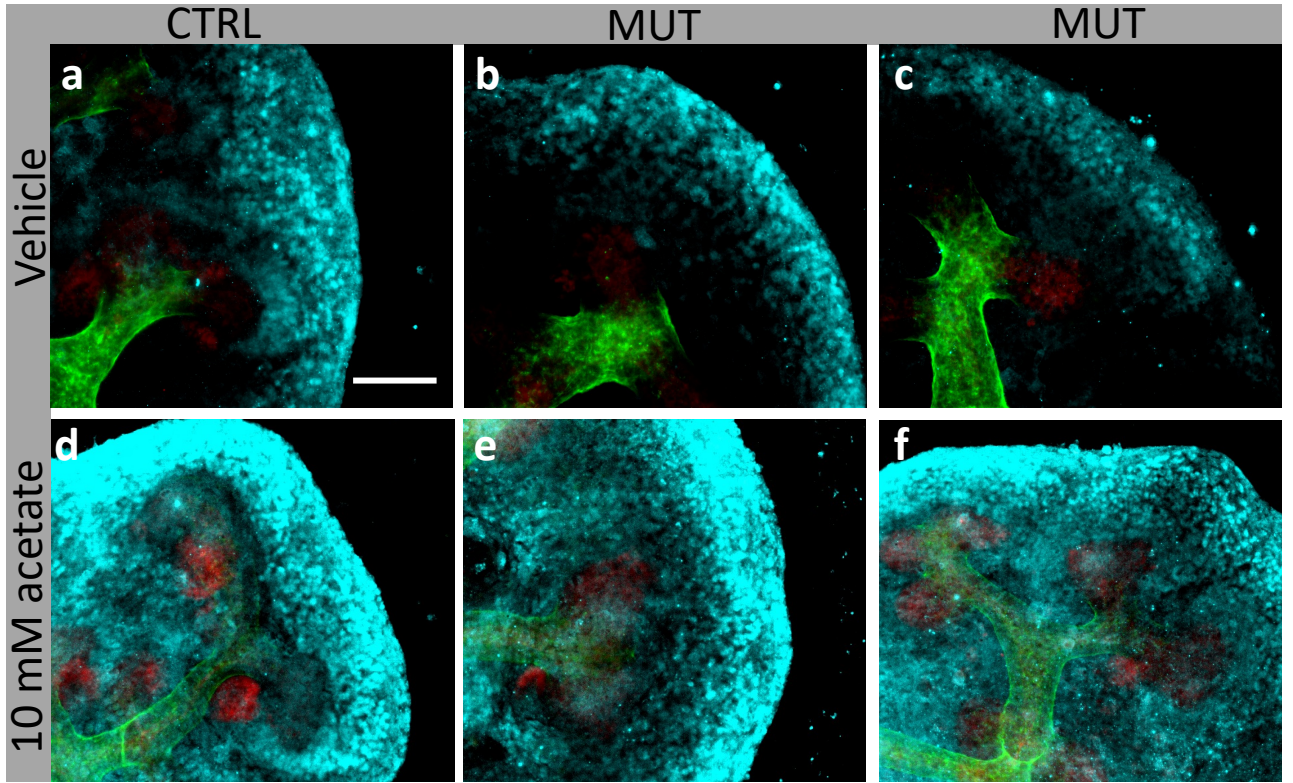

**Fig.S11: Acetate supplementation is sufficient to rescue CM size in kidneys lacking *Acly* in *Six2*-expressing cells.** Five pairs of kidneys from control (CTRL) and mutant (MUT) embryos at E12.5 were cultured for 24 hours with either vehicle (a, b, c) or 10 mM sodium acetate (d, e, f). Sodium acetate prevented CM depletion observed in the mutant embryos (compare a to b and c) and promoted CM expansion in both control and mutant embryos (d to f). The immunostaining was performed using antibodies against *Six2* (nephron progenitor cells, cyan), *Lhx1* (nascent nephrons, red), and UB (DBA, green). The figure shows 1/5 control and 2/5 mutant kidneys. Scale bar 100  $\mu$ m.
